# Supplementary material for: Earliest isotopic evidence of high reliance on plant food in the Late Pleistocene hunter-gatherer population (Taforalt, Morocco)
Source: Research Square preprint supplement (doi:10.21203/rs.3.rs-3082487/v1), 2023-06-24
Supplement: Supplementary file 1 [file 62aa2451e5d2861472e5a5cf.xlsx]

## Sheet: Table SI 1 
Table SI 1: The faunal species included in our stud along with their diet and water intake
			Taxon	SEVA	#REF	Diet	Sector	Element	Food	water intake
			Barbary sheep	35819	TAF.13-12280	herbivore	sector 10	M3	Mixed feeder	drought-tolerant
			Barbary sheep	35821	TAF.13-11819	herbivore	sector 10	dm3	Mixed feeder	drought-tolerant
			Barbary sheep	35830	TAF 13- 11933	herbivore	sector 10	I	Mixed feeder	drought-tolerant
			Barbary sheep	35831	TAF 13- 11757	herbivore	sector 10	M2	Mixed feeder	drought-tolerant
			Barbary sheep	34566	TAF 05- 3475	herbivore	sector 10		Mixed feeder	drought-tolerant
			Hartebeest	35824	TAF-1807	herbivore		M3	grazer
			Gazelle	35833	TAF 05- 2450	herbivore	sector 10	P	Mixed feeder	drought-tolerant
			Fox	35828	TAF 05- 2498	carnivore	sector 10	M1	carnivore
			Gazelle	35832	TAF 13- 11660	carnivore	sector 10	P2/P3	Mixed feeder	drought-tolerant
			Canid	35834	TAF 10- 11226	carnivore	sector 10	M	carnivore
			Equus	35820	TAF.04-379	herbivore	sector 8	M1 /2	grazer	water-dependent
			Equus	35822	TAF.13-11617	herbivore	sector 10	I	grazer	water-dependent
			Equus	35825	TAF.04- 2188	herbivore		M3	grazer	water-dependent
			Equus	35826	TAF 13 - 12127	herbivore	sector 10	dp	grazer	water-dependent
			Equus	34565	TAF 10- 11408	herbivore		M	grazer	water-dependent
			Gazelle	35829	TAF 05- 2649	herbivore	sector 10	M3	Mixed feeder	drought-tolerant
			Gazelle	35835	TAF 04- 1842	herbivore	sector 8	P2	Mixed feeder	drought-tolerant
			Hare	35823	TAF 05-2907	herbivore	sector 10	bone	grazer	water-dependent
			Hartebeest	35827	TAF 08- F23	herbivore	sector 4	M2	grazer	drought-tolerant
			Rhinoceros	35836	TAF 04- 375	herbivore	sector 8	P or M	grazer	water-dependent

## Sheet: Table SI 2
Table SI 2: The human individuals from Taforalt included in our study along with their age and gender estimation
	Individual	SEVA	#REF	Element	Sex	Age of death
	1	35961	TAF_06_3966	M2	male	20 yrs
	1	35962	TAF_06_4164	M2	male	20 yrs
	1	35967	TAF_06_3966	I2	male	20 yrs
	1	35970	TAF_06_3967	M	male	20 yrs
	1	35979	TAF_06_4167	P4	male	20 yrs
	1	35985	TAF_06_H576	bone	male	20 yrs
	1	35963.A	TAF_06_4164	C	male	20 yrs
	1	35963.B	TAF_06_4164	M2	male	20 yrs
	2	35981	TAF_05_3281	bone	ND	ND
	5	35977	TAF_08_6875	M2	female	16-18 yrs
	5	35978	TAF_08_6875	C	female	16-18 yrs
	5	35971.A	TAF_08_6880	I1	female	16-18 yrs
	5	35971.B	TAF_08_6880	M1	female	16-18 yrs
	6	35964	TAF_06_4753	m2	male	6-12 mo
	6	35965	TAF_06_4753	i1	male	6-12 mo
	6	35982	TAF_08_5883	bone	male	6-12 mo
	6	35983	TAF_08_5753	bone	male	6-12 mo
	9	35966	TAF_09_8111	i1	female	5-6 mo
	9	35966	TAF_09_8111	bone	female	5-6 mo
	13	35975	TAF_13_1000	M3	male	18-20 yrs
	13	35975	TAF_13_1000	bone	male	18-20 yrs
	14	35980	TAF_10_10105	P4	male	18-20 yrs
	unassigned	35959	TAF_05_2882	bone	ND	ND
	unassigned	35959	TAF_05_2882	I	ND	ND
	unassigned	35960	TAF_05_3380	I2	ND	ND
	unassigned	35968	TAF_04_1031	M3	ND	ND
	unassigned	35969	TAF_05_3685	I2	ND	ND
	unassigned	35972	TAF_06_4224	P3	ND	ND
	unassigned	35973	TAF_05_3144	I2	ND	ND
	unassigned	35974	TAF_06_3907	M3	ND	ND
	unassigned	35976	TAF_05_3613	M	ND	ND
	unassigned	34561	TAF_10_11025	I1	ND	ND

## Sheet: Table SI3  Isotopic results of 
Individual	sex	Sample name	Type	Tooth	Part sampled	Age crown dev. (Al Qahtani)	age of sampled enamel (Reid & Dean)	d66Zn	d66Zn dent	Zn (ppm)	86Sr/88Sr	Sr ppm	Part sampled	Age of sampled root formation	d13C	d15N	%C	%N	C/N	d64S	S (%)	d15NPhe	d15NGlu	d13CPhe	d13CVal	TP
Ind.1	male	35961.1	M2	ULM2	bottom	8 yrs	5.7-6.4	0.813759		284.833	0.709199	60.8063	root	7 yr - 16 yr	-18.8237	11.2877	14.4022	5.61603	3.00592
Ind.1	male	35961.2	M2	ULM2	top	3 yrs	4.2-4.9	0.855718		212.795	0.709171	47.4884
Ind.1	male	35962.1	M2	LLM2	bottom	8 yrs	5.7-6.2	0.659338		129.263	0.709176	78.3389	root	7 yr - 15 yr
Ind.1	male	35962.2	M2	LLM2	top	3 yrs	4.2-4.7	0.765785		122.812	0.709195	50.3689
Ind.1	male	35963.A.1	C	LLC	bottom	7 yrs	3.7-6.2	0.710357		175.707	0.709257	76.5759	root	6 yr - 14 yr	-18.5511	10.2637	26.9932	10.1679	3.08721
Ind.1	male	35963.A.2	C	LLC	top	5 mo	1.4-2.1	0.796215		131.009	0.709172	42.8478
Ind.1	male	35963.B.1	M2	LLM2	bottom	8 yrs	5.7-6.2	0.833211		285.743			root	7 yr - 15 yr
Ind.1	male	35963.B.2	M2	LLM2	top	3 yrs	4.2-4.7	0.823497		287.716
Ind.1	male	35967.1	I2	LRI2	bottom	5 yrs	2.6-3.8	0.785904		97.1428	0.709247	83.058	root	4 yr -10 yr	-19.0443	10.7908	38.2703	14.1469	3.15911
Ind.1	male	35967.2	I2	LRI2	top	4 mo	1-1.5	0.783903		133.487	0.709185	54.9934
Ind.1	male	35967.3	I2	LRI2	total						0.70922	76.5932
Ind.1	male	35970.1	M	UxM	bottom			0.696306		118.016	0.70918	43.9313	root	20 yr
Ind.1	male	35970.2	M	UxM	top			0.815497		65.0445	0.709246	27.9569
Ind.1	male	35979.1	P4	LRP3 OU LRP4	bottom	7 yrs		0.72562		205.617			root	6 yr - 10 yr	-18.6277	9.90543	33.5861	11.9156	3.28708
Ind.1	male	35979.2	P4	LRP3 OU LRP4	top	2.5 yrs		0.801453		92.5762
Ind.1	male	35985	Bone	Bone											-18.6252	8.76683	47.8338	17.0771	3.26642			12.265	12.664	-27.7095	-28.8415	2.15776
Ind.5	female	35971.A.1	I1	LLI1	bottom	5 mo	2-3.4	0.77266		206.031	0.709216	29.75	root	4 yr - 9 yr
Ind.5	female	35971.A.2	I1	LLI1	top	4 mo	0.8-1.3	0.826932		150.714	0.709247	20.0319
Ind.5	female	35971.B.1	M1	LRM1	bottom	3 yrs	2.2-3.1	0.817069		227.824	0.709125	40.6602	root	3 yr - 10 yr	-18.7789	10.0288	35.1794	13.212	3.10518
Ind.5	female	35971.B.2	M1	LRM1	top	0 yrs	1-1.4	0.755918		319.524	0.709138	32.2706
Ind.5	female	35977.1	M2	ULM2	bottom	8 yrs	5.7-6.4	0.821527		319.114	0.709192	66.598	root	7 yr - 16 yr	-18.3571	10.0617	25.0558	9.414	3.10589
Ind.5	female	35977.2	M2	ULM2	top	3 yrs	4.2-4.9	0.704522		227.877	0.709187	60.0943
Ind.5	female	35977.3	M2	ULM2	total	3- 8 yrs	4.2-6.4	0.75202		224.685
Ind.5	female	35978.1	C	ULC	bottom	7 yrs	4-4-4.8	0.766912		238.318	0.709167	54.3958	root	6 yr - 13 yr	-18.5934	10.9237	40.9772	14.8826	3.21035
Ind.5	female	35978.2	C	ULC	top	5 mo	1.7-2.3	0.721348		197.123	0.709224	37.2345
Ind.5	female	35978.3	C	ULC	total but most from the middle	5 mo- 7 yrs	2.3-3.5	0.742457		107.456
Ind.6	male	35964.1	dm2	URdm2	bottom	10 mo		1.02901		138.527	0.709181	46.7357	all	18 wk I.U - 1.66667	-18.6353	13.4554	39.8959	14.9248	3.11757			11.2405	16.696	-28.429	-27.335	2.82309
Ind.6	male	35964.2	dm2	URdm2	top	18 wk I.U		0.887949		176.094	0.709193	37.2853
Ind.6	male	35964.3	dm2	URdm2	total						0.709212	33.6205
Ind.6	male	35965.1	di1	URdi1	bottom	1.5 mo		0.864508		119.545			all	14 wk I.U - 1 yr	-18.7616	12.7534	34.4998	12.9263	3.11414
Ind.6	male	35965.2	di1	URdi1	top to middle	14 wk I.U		0.761627		91.2987	0.709207	51.1612
Ind.6	male	35965.3	di1	URdi1	total	14 wk I.U -1.5 mo		0.78934		99.7399
Ind.6	male	35983	Bone	Bone				_							-18.5557	12.5296	44.2154	15.9803	3.22667			13.704	16.8445	-28.182	-26.7885	2.51849
Ind.6	male	35982	Bone	Bone				_							-18.7111	12.549	45.7544	16.2721	3.2791			10.4	16.7875	-28.275	-29.08	2.94572
Ind.9	female	35966.1	di1	URdi1	bottom	1.5 mo		0.883619		93.0481	0.709317	78.5623	root	14 wk I.U - 6 mo	-18.7936	12.9218	38.7927	14.4914	3.1238
Ind.9	female	35966.2	di1	URdi1	top	14 wk I.U		0.823006		107.612
Ind.9	female	35966	Bone	Bone											-18.6837	12.3065	45.9883	16.8034	3.19166			12.284	17.14	-28.3345	-27.8565	2.74421
Ind.13	male	35975.1	LRM3	LRM3	bottom	16 yrs	10.4-11.3	0.88183		156.7	0.709371	97.754	root	20 yr	-18.7134	11.4731	36.9792	13.583	3.17632			11.949	15.74	-28.3405	-29.779	2.60408
Ind.13	male	35975.2	M3	LRM3	top	10 yrs	9.9-9.3	0.809973		131.642
Ind.13	male	35975	Bone	Bone				_							-18.6424	12.0516	40.7214	14.9705	3.16926
Ind.14	male	35980.1	P4	LRP4	total	2.5- 7 yrs		0.91		379	0.709249	114.258	root	6 yr - 10 yr
unassigned		35959.1	LxI	LxI	root	dentine		_	1.06349	409.453			total	4mo -10 yr	-18.9513	11.8172	32.5369	12.1029	3.13805			11.3465	15.9345	-28.109	-29.021	2.70895
unassigned		35960.1	llI2	llI2	bottom	5 yrs	2.6-4.2	0.838252		162.235	0.709247	63.4163	root	4 yr -10 yr	-18.8733	10.4229	41.7298	15.647	3.11004			13.021	13.5245	-28.1995	-29.698	2.17151
unassigned		35960.2	I2	llI2	top	4 mo	1.0-1.5	0.785775		192.115	0.70925	53.3745
unassigned		35968.1	ULM3	ULM3	top (but very worn tooth)	12 yrs	10.4-11.3	0.75305		177.828	0.709081	155.13	root	12 yr - 25 yr	-19.1557	10.9093	38.5365	14.4753	3.10421			12.8195	15.635	-28.645	-30.0895	2.47572
unassigned		35969.1	LRI2	LRI2	bottom	5 yrs	2.6-3.8	0.898375		153.817	0.708995	148.816	root	4 yr -10 yr	-18.7709	11.5818	40.4959	15.1736	3.11208			13.6455	15.9595	-28.0525	-29.36	2.40974
unassigned		35969.2	I2	LRI2	top	4 mo	1-1.5	0.946193		58.5452
unassigned		35972.1	LLP3	LLP3	middle to top	2 yrs		0.745619		163.642	0.709147	38.6831	root	5 yr - 14 yr	-19.2636	11.5311	42.434	15.5745	3.17869			12.1445	15.2165	-28.445	-29.8555	2.50947
unassigned		35973.1	I2	I2	middle to top but so worn	7 yrs	1.5-3.3	0.690767		86.4975	0.709068	121.967	root	4 yr -10 yr	-18.8406	11.6531	43.8658	15.9903	3.19845			11.9505	15.897	-28.8725	-28.7865	2.62454
unassigned		35974.1	M3	ULM3	bottom	16 yrs	10.3-11.3	0.717147		148.58	0.709271	77.4998	root	12 yr - 25 yr
unassigned		35974.2	M3	ULM3	top	9 yrs	9.3-9.8	0.696817		127.435				12 yr - 25 yr	-18.7134	11.4731	36.9792	13.583	3.17632
unassigned		35976.1	LRM	LRM	bottom to middle			0.814982		73.335	0.709018	191.573	root		-18.8975	11.1095	43.354	15.8929	3.18164			12.735	15.382	-27.647	-30.047	2.45355
unassigned		34561	I1	UI1	total	4 mo - 5 yrs	1.1-5.0	0.68		72.5645	0.70932	61	root	4 yr -10 yr	-19.29	10.58	44.5188	16.5725	3.13402	12.87	0.16	11.7527	15.2393	-26.5335	-27.563	2.56404
unassigned		35959	Bone	Bone											-18.9042	11.5054	39.0381	14.575	3.12092

## Sheet: Table SI 4
Table SI:4: The isotopic results of the animals from Taforalt
	Specie	Sample name	Tooth	Part of sampled enamel	d66Zn	Zn (ppm)	86Sr/88Sr	Sr ppm	Part of sample	d13C	d15N	%C	%N	C/N	d64S	S (%)	d15NPhe	d15NGlu	TP
	Barbary sheep	35819.1	M3	bottom	1.09721	84.3615	0.709128	62.2639	root	-19.6905	7.80715	40.6545	14.9069	3.18167
	Barbary sheep	35819.2	M3	middle	1.10392	66.1309	0.70911	52.234
	Barbary sheep	35819.3	M3	top	1.10107	70.7949	0.709015	49.7656
	Barbary sheep	35819.4	M3	total	0.894466	161.431	0.708954	59.3143
	Barbary sheep	35819.5					0.709002	56.9434
	Barbary sheep	35821.1	dm3	top	1.25708	79.7167	0.70932	53.4157	root	-19.8023	11.7345	42.5189	15.5987	3.17956			16.675	16.2825	2.05362
	Barbary sheep	35830.1	I	top	0.668521	25.339	0.709255	69.6892	root	-19.5183	6.68173	41.7043	15.6339	3.11112			11.589	11.3555	2.07454
	Barbary sheep	35830.2	I	bottom	0.968448	126.574
	Barbary sheep	35831.1	M2	bottom	1.1803	139.952	0.708822	95.9397
	Barbary sheep	35831.2	M2	middle	1.08756	74.0818	0.708743	162.048
	Barbary sheep	35831.3	M2	top	1.19389	60.8427
	Barbary sheep	35831.4	M2	total	1.16595	66.8964
	Barbary sheep	34566	M	total	0.82	44.5553	0.70938	114	root	-20.29	5.47	43.6474	15.8188	3.21909	14.5759	0.14
	Hartebeest	35824.1	M3	bottom	1.1039	69.7079	0.708896	166.845	root	-18.9826	11.1945	41.0029	15.0081	3.18719			13.4785	14.1775	2.19724
	Hartebeest	35824.2	M3	middle	1.15925	62.1953	0.708853	51.1724
	Hartebeest	35824.3	M3	top	1.32475	82.3472
	Hartebeest	35824.4	M3	total	1.29493	91.766
	Gazelle	35833.1	P	top to middle	1.1	93.8904	0.709284	29.4913		-19.5953	6.88487	41.5959	15.3116	3.16925			10.498	11.0685	2.0302
	Fox	35828.1	M1	top	0.612724	60.5437	0.709346	59.2093	root	-18.3732	10.867	41.9216	15.7935	3.09569			10.1345	16.088	2.88862
	Gazelle	35832.1	P2 or P3	total	1.236	106.588	0.709507	144.671
	Canid	35834.1	M1	top	0.42	77.565	0.709265	40.813	root	-18.7233	11.2879	43.4481	15.7845	3.21008			11.4315	16.309	2.74704
	Equid	35820.1	M1 /2	bottom	1.30651	35.5604	0.708941	171.488	root	-18.5626	10.3099	42.1206	15.7101	3.12725			15.9655	14.867	1.96072
	Equid	35820.2	M1 /2	middle	1.27974	17.6209	0.708933	195.186
	Equid	35820.3	M1 /2	top	1.32745	47.7472	0.708899	193.183
	Equid	35820.4	M1 /2	total	1.36783	55.0595	0.708893	216.635
	Equid	35820.5					0.708933	243.697
	Equid	35822.1	I	bottom	1.29823	43.9816	0.70889	191.292	root	-19.6876	8.89905	41.788	15.3094	3.1865			14.916	12.1825	1.74559
	Equid	35822.2	I	top	1.3522	44.0622	0.708894	135.534
	Equid	35822.3	I	total	1.37403	69.3359	0.708876	205.277
	Equid	35825.1	M3	bottom	1.40851	92.5382	0.709118	143.455	root	-18.2306	6.74518	40.3315	15.0783	3.1194			13.4535	10.6955	1.74237
	Equid	35825.2	M3	middle	1.35715	76.2825	0.709044	166.074
	Equid	35825.3	M3	top
	Equid	35825.4	M3	total
	Equid	35826.1	Dp	bottom	1.33064	47.4596	0.709007	128.783	root	-18.116	8.74943	41.8209	15.5055	3.14586			12.287	12.335	2.11158
	Equid	35826.2	Dp	middle	1.28297	22.0643	0.708971	61.5834
	Equid	35826.3	Dp	top	1.3137	27.9353
	Equid	35826.4	Dp	total	1.44656	63.0735
	Equid	34565	M	total	1.14	14.0954	0.70914	108	root	-19.52	8.12	44.4171	16.1713	3.20443	12.4776	0.13
	Gazelle	35829.1	M3	bottom	0.99425	114.349	0.709129	26.5418	root	-20.4274	6.67547	40.7692	15.2195	3.12409			11.2105	9.749	1.91296
	Gazelle	35829.2	M3	middle	0.90819	119.944	0.709182	67.5795
	Gazelle	35829.3	M3	top	0.783051	98.8303
	Gazelle	35829.4	M3	total	0.875237	118.415
	Gazelle	35835.1	P2	total	1.07601	104.252	0.70927	90.1449	root	-19.3528	8.90975	43.5735	16.1247	3.15176			13.9675	13.263	2.01257
	Hartebeest	35827.1	M2	bottom	1.43591	37.7871	0.709009	92.8595	root	-18.6513	11.6208	39.3326	14.5529	3.15232			13.4405	15.015	2.31243
	Hartebeest	35827.2	M2	middle	1.39852	36.4098	0.708967	117.824
	Hartebeest	35827.3	M2	top	1.20728	71.0746
	Hartebeest	35827.4	M2	total	0.9885	38.321
	Hare	35823							bone	-20.9087	6.06195	42.9247	15.8449	3.16014			9.118	10.692	2.31237
	Rhinoceros	35836.1	M or P	bottom	1.10686	110.958	0.709106	625.749	root	-18.063	10.591	45.0849	16.6027	3.167			14.4555	16.111	2.32309
	Rhinoceros	35836.2	M or P	top	1.11126	111.724
	Rhinoceros	35836.3	M or P	total	1.08043	102.671

## Sheet: Table SI 6
Individual	sex	d66Znavg.	Zn (std)	86Sr/88Sr (avg.)	86Sr/88Sr (std)	d13C (avg.)	d13C (std.)	d15N	d15N (std.)	84S	d15NPhe	d15NPhe (std.)	d15NGlu	d15NGlu (std.)	d13CPhe	d13CPhe (std.)	d13CVal	d13CVal (std.)	TP
Ind.1	male	0.776183	0.0575119	0.709204	3.25464e-05	-18.7344	0.200599	10.2029	0.958765		12.265		12.664		-27.7095		-28.8415		2.15776
Ind.5	female	0.768137	0.042201	0.709187	4.23217e-05	-18.5765	0.211397	10.3381	0.507466
Ind.6	male	0.866487	0.104674	0.709198	1.43634e-05	-18.6659	0.089951	12.8219	0.434331		11.7815	1.71715	16.776	0.0749149	-28.2953	0.124749	-27.7345	1.19685	2.76243
Ind.9	female	0.853313	0.0428594	0.709317		-18.7386	0.0777227	12.6141	0.435129		12.284		17.14		-28.3345		-27.8565		2.74421
Ind.13	male	0.845902	0.0508108	0.709371		-18.6779	0.0502159	11.7623	0.409097		11.949		15.74		-28.3405		-29.779		2.60408
Ind.14	male	0.91		0.709249
Table SI 6: The mean value of the isotopic results for each human individual from Taforalt analysed in this study

## Sheet: Table SI 5
Table SI 5: The zooarchaeological and the ZooMs identification of the animal species
ID	Sector	S-EVA	Zooarchaological identification	Tissue Type	ZooMS	Final identification	Latin name
TAF 10- 11408		34565	Equus	M	not analyzed	Equus	Equidae
TAF 05- 3475	sector 10	34566	Barbary sheep		not analyzed	Barbary sheep	Ammotragus lervia
TAF.13-12280	sector 10	35819	Barbary sheep	M3	Unidentifiable	Barbary sheep	Ammotragus lervia
TAF.04-379	sector 8	35820	Equus	M1 /2	Equidae	Equus	Equidae
TAF.13-11819	sector 10	35821	Barbary sheep	dm3	Caprinae (Ovis)	Barbary sheep	Ammotragus lervia
TAF.13-11617	sector 10	35822	Equus	I	Equidae	Equus	Equidae
TAF 05-2907	sector 10	35823	Hare	bone	Unidentifiable	Hare	Lepus
TAF-1807		35824	Bovid	M3	Alcelaphinae	Hartebeest	Alcelaphus buselaphus
TAF.04- 2188		35825	Equus	M3	Equidae	Equus	Equidae
TAF 13 - 12127	sector 10	35826	Equus	dp	Equidae	Equus	Equidae
TAF 08- F23	sector 4	35827	Alcelaphus	M2	Alcelaphinae	Hartebeest	Alcelaphus buselaphus
TAF 05- 2498	sector 10	35828	Fox	M1	Unidentifiable	Fox	Vulpes Vulpes
TAF 05- 2649	sector 10	35829	Gazelle	M3	Bovidae (not Bovinae or Caprinae) / Cervinae / Giraffidae	Gazelle	Gazella sp.
TAF 13- 11933	sector 10	35830	Barbary sheep	I	Caprinae (Ovis)	Barbary sheep	Ammotragus lervia
TAF 13- 11757	sector 10	35831	Barbary sheep	M2	Caprinae (Ovis)	Barbary sheep	Ammotragus lervia
TAF 13- 11660	sector 10	35832	Gazelle	P2/P3		Gazelle	Gazella sp.
TAF 05- 2450	sector 10	35833	Gazelle	P	Antilopinae	Gazelle	Gazella sp.
TAF 10- 11226	sector 10	35834	Canid	M	Canidae (not red fox)	Canid	Canidae
TAF 04- 1842	sector 8	35835	Gazelle	P2		Gazelle	Gazella sp.
TAF 04- 375	sector 8	35836	Rhinoceros	P or M	Rhinocerotidae	Rhinoceros	Rhinocerotidae

## Sheet: Table SI 7
Individual	sex	age of death	SEVA	tooth	presence of caries	presence of hypoplasia	location	period of hypoplasia/ stress	note
1	male	20 yr	35963.B	LLM2	yes	yes	crown and root	3yrs-16yrs	Individual 1 suffered from stress from around 3 years until 16 years
			35961	ULM2	no	yes	crown and root	3.5 yrs-16yrs
			35963.A	LLC	no	yes	crown and root	4yrs- 14yrs
			35962	LLM2	yes	yes	root	7 yrs- 15yrs
			35970	UxM	no	yes	crown	?
			35967	LRI2	no	yes	crown and root	3 yrs-10yrs
5	female	16-18 yr	35971.A	LLI1	no	yes	crown and root	small hypoplasia around 3 yrs and again 5yrs	Individual 5 had stress from around 2.5 until 5 years
			35971.B	LRM1	no	yes	crown enamel	between 2.5 yrs and 5 yrs
			35978	ULC	no	no	crown	light EH around 3.5 yrs
6	male	6-12 mo	35965	URdi1	no	yes	root dentine	4.5mo-11mo	Individual 6 had stress between 4.5 and 11 month and died at 12 month. probably didn't survive the stress
			35964	URdm2	no	no
9	female	5-6 mo	35966	ULM2	no	no
13	male	18-20 yr	35975	LRM3	no	yes	crown enamel	around 13-14yrs	Individual 13 suffered from stress around 13- 14 years
14	male	18-20 yr	35980	LRP4	no	yes	crown and root	4yrs- 10yrs	Individual 14 suffered from stress between 4 and 10 years
unassigned			35959	LxI	no	yes	root	3yrs- 11yrs
unassigned			35960	llI2	no	yes	crown and root	strong EH 3yrs-5yrs + slight stress between 5 and 10yrs
unassigned			35968	ULM3	no	yes	crown and root	14yrs-16yrs
unassigned			35969	LRI2	no	yes	root	7yrs-10yrs
unassigned			35972	LLP3	no	yes	root	6yrs-10yrs
unassigned			35973	LRI2 ou LRC	no	no
unassigned			35974	ULM3	yes	yes	crown and root	12 yrs-
unassigned			35976	LRM	no	yes	crown and root	?
unassigned			34561	UI1

## Sheet: Table SI 8
Table SI 8: Nitrogen isotope data on amino acids
Average of δ15NAir (‰)					Column Labels
Site	Row Labels	SEVA	Specie	tooth type	Ala	Asx	Glx	Gly	Hyp	Ile	Leu	Lys	Phe	Pro	Ser	Thr	Tyr	Val
Taforalt	KJ104	35820	Equid	M1 /2	10.656	14.222	14.867	5.338	16.091		12.536	10.843	15.9655	16.0995	7.2735	-3.6935		14.15
Taforalt	KJ105	35821	Barbary sheep	m3	14.7755	15.249	16.2825	11.7525	16.2945		16.005	8.0175	16.675	15.6815	11.6555	-6.9165		16.9975
Taforalt	KJ106	35822	Equid	I	10.3755	12.662	12.1825	4.1015	12.8955		11.2825	8.278	14.916	13.0645	5.465	-4.527		12.7035
Taforalt	KJ107	35823	Hare	bone	6.654	9.6985	10.692	3.3195	11.0595		8.3815	4.5105	9.118	10.9415	3.561	-8.916		10.431
Taforalt	KJ108	35824	Hartebeest	M3	11.749	13.5865	14.1775	10.9	14.5755		13.028	8.214	13.4785	14.975	8.218	-5.979		14.3155
Taforalt	KJ109	35825	Equid	M3	7.772	11.1245	10.6955	4.2955	11.1265		9.2615	7.168	13.4535	11.1745	5.623	-7.1475		10.822
Taforalt	KJ110	35826	Equid	Dp	8.9305	11.87	12.335	7.653	12.834		10.5085	9.167	12.287	12.443	9.2475	-5.691		12.0905
Taforalt	KJ111	35827	Hartebeest	M2	12.319	14.103	15.015	12.936	15.028		14.0635	8.73	13.4405	14.3985	11.114	-4.964		16.365
Taforalt	KJ112	35828	Fox	M1	14.918	13.8335	16.088	11.42	17.2295		13.547	6.716	10.1345	17.2665	8.395	-15.7845		15.5525
Taforalt	KJ113	35829	Gazelle	M3	6.1755	8.5795	9.749	7.794	10.4325		7.4815	5.015	11.2105	10.061	5.045	-11.301		10.6635
Taforalt	KJ114	35830	Barbary sheep	I	6.582	10.6125	11.3555	6.7205	11.442		8.689	4.1615	11.589	11.0435	4.603	-9.432		9.732
Taforalt	KJ115	35833	Gazelle	P	6.9495	9.316	10.498	7.4225	10.7545		8.015	4.887	11.0685	10.831	4.3375	-11.373		9.825
Taforalt	KJ116	35834	Canid	M	15.4365	14.4505	16.309	11.5895	17.0355		14.343	7.5775	11.4315	16.8835	9.417	-14.6575		15.5145
Taforalt	KJ117	35835	Gazelle	P2	10.2665	13.225	13.263	9.2385	12.5915		11.917	6.4895	13.9675	12.0765	8.2815	-8.1515		12.5625
Taforalt	KJ118	35836	Rhinoceros	M	11.68	16.1745	16.111	7.5745	17.159		13.3835	10.38	14.4555	16.7015	6.4165	-6.216		15.0665
Taforalt	KJ120	35959	Human	P4	13.9135	14.312	15.9345	11.645	16.868		13.9315		11.3465	16.59	10.282	-15.936		14.673
Taforalt	KJ121	35960	Human	I2	12.1085	12.4805	13.5245	10.9195	15.241		12.282	6.0495	13.021	15.213	11.9655	-13.022		14.4865
Taforalt	KJ122	35964	Human	m2	15.306	15.3475	16.696	16.798	18.2685		14.9	7.5455	11.2405	18.1575	13.6025	-14.3625		17.6145
Taforalt	KJ123	35966	Human	bone	14.4655	15.8475	17.14	11.679	18.963		16.356	7.39	12.284	18.673	14.706	-13.5635		17.5725
Taforalt	KJ124	35968	Human	M3	13.9175	14.973	15.635	10.89	17.0645		12.95	4.7825	12.8195	16.491	10.6195	-10.094		14.511
Taforalt	KJ125	35969	Human	I2	14.574	14.374	15.9595	11.3595	16.557		13.274	7.059	13.6455	16.282	11.0505	-11.5815		15.6125
Taforalt	KJ126	35972	Human	P3	13.4095	13.876	15.2165	13.298	16.446		12.3275	5.8605	12.1445	16.0325	11.5015	-12.8245		13.9215
Taforalt	KJ127	35973	Human	I2	13.981	14.3075	15.897	11.3225	16.3075		14.161	10.6465	11.9505	16.1795	10.769	-15.202		15.0375
Taforalt	KJ128	35975.T	Human	M3	14.184	13.9645	15.74	12.974	17.065		14.0055	5.97	11.949	16.4875	10.73	-14.78		14.7175
Taforalt	KJ129	35976	Human	M	13.9355	14.1575	15.382	11.711	16.6225		13.104	5.72	12.735	16.161	10.8615	-12.7185		15.302
Taforalt	KJ130	35982	Human	bone	15.0075	16.0575	16.7875	13.994	18.943		15.9455	7.181	10.4	18.409	14.2805	-15.3755		16.243
Taforalt	KJ131	35983	Human	bone	14.132	16.474	16.8445	13.2865	18.094		15.4785	6.862	13.704	17.8215	14.0595	-15.1905		16.166
Taforalt	KJ132	35984	Human		8.9195	11.3415	11.824	7.6925	13.823		10.0085	4.9285	8.6895	13.837	8.701	-13.146		12.225
Taforalt	KJ133	35985	Human	bone	11.6365	11.7815	12.664	8.331	15.203		11.515	5.787	12.265	14.8435	9.57	-12.821		13.253
StdDev of δ15NAir (‰)					Column Labels
Site	Row Labels	SEVA	Specie	tooth type	Ala	Asx	Glx	Gly	Hyp	Ile	Leu	Lys	Phe	Pro	Ser	Thr	Tyr	Val
Taforalt	KJ104	35820	Equid	M1 /2	0.239002	0.0296985	0.151321	0.277186	0.377595		0.244659	0.130108	0.241123	0.188798	0.598919	1.57897		0.442649
Taforalt	KJ105	35821	Barbary sheep	m3	0.381131	0.159806	0.17607	0.497096	0.966615		0.0537401	0.538108	0.0452548	0.297692	0.072832	0.798324		0.255266
Taforalt	KJ106	35822	Equid	I	0.0756604	0.0127279	0.143543	0.284964	0.0219203		0.581949	0.683065	0.213546	0.00494975	0.46669	0.0155563		0.378302
Taforalt	KJ107	35823	Hare	bone	0.0975807	0.0374767	0.509117	0.0374767	0.122329		0.190212	0.470226	0.42285	0.00636396	0.304056	0.14425		0.216375
Taforalt	KJ108	35824	Hartebeest	M3	0.0608112	0.973686	0.316077	0.660438	0.0388909		0.282843	0.639225	0.170413	0.0975807	0.205061	0.309713		0.997728
Taforalt	KJ109	35825	Equid	M3	0.0636396	0.717713	0.123744	0.347189	0.378302		0.122329	1.10874	0.321734	0.0756604	0.268701	0.1393		0.403051
Taforalt	KJ110	35826	Equid	Dp	0.195869	0.066468	0.046669	0.284257	0.189505		0.197283	0.704278	0.588313	0.205061	0.0473762	0.207889		0.399515
Taforalt	KJ111	35827	Hartebeest	M2	0.189505	0.271529	0.323855	0.371938	0.329512		0.569221	0.958837	0.446184	0.0657609	0.192333	0.113137		0.376181
Taforalt	KJ112	35828	Fox	M1	0.0367696	0.241123	1.06349	0.0282843	0.118087		0.0410122	1.13703	0.704985	0.672459	0.165463	0.0318198		0.35426
Taforalt	KJ113	35829	Gazelle	M3	0.284964	0.0700036	0.230517	0.128693	0.11243		0.399515	1.49341	0.188798	0.0282843	1.055	0.0721249		0.692258
Taforalt	KJ114	35830	Barbary sheep	I	0.0650538	0.639932	0.0247487	0.171827	0.50346		0.178191	0.47164	0.328098	0.0176777	0.128693	0.857013		0.421436
Taforalt	KJ115	35833	Gazelle	P	0.201525	0.120208	0.183848	0.205768	0.171827		0.0551543	0.0311127	0.792667	0.00848528	0.768625	0.00282843		0.41295
Taforalt	KJ116	35834	Canid	M	0.323148	0.55225	0.0876812	0.371231	0.610233		0.390323	1.08399	0.871863	0.204354	0.852771	1.69918		0.272236
Taforalt	KJ117	35835	Gazelle	P2	0.434871	0.219203	0.0678823	0.282136	0.318905		0.0735391	0.0827315	0.173241	0.335876	0.638517	0.20294		0.597505
Taforalt	KJ118	35836	Rhinoceros	M	0.0537401	0.986414	0.0565685	0.177484	0.156978		0.396687	0.0127279	1.44462	0.263751	1.562	1.0748		1.19996
Taforalt	KJ120	35959	Human	P4	0.194454	0.43982	0.0601041	0.0268701	0.704278		1.37815		0.825194	0.417193	1.47785	1.00551		0.599627
Taforalt	KJ121	35960	Human	I2	0.522552	0.0318198	0.351432	0.423557	0.63781		0.31537	1.0444	0.363453	0.572756	0.576292	1.33926		1.41068
Taforalt	KJ122	35964	Human	m2	0.123037	0.0205061	0.179605	0.499217	0.64276		0.231931	0.822365	0.402344	0.0954594	0.999142	2.19698		0.970858
Taforalt	KJ123	35966	Human	bone	0.111016	0.311834	0.179605	0.046669	0.219203		0.571342	0.250316	0.480833	0.246073	0.347897	0.026163		0.0898026
Taforalt	KJ124	35968	Human	M3	0.109602	0.0367696	0.562857	0.182434	0.58902		0.793374	0.16617	1.31168	0.255973	0.847821	0.158392		0.374767
Taforalt	KJ125	35969	Human	I2	0.298399	0.176777	0.0289914	0.392444	0.469519		0.811759	0.196576	1.32017	0.456791	1.56624	0.734684		0.772868
Taforalt	KJ126	35972	Human	P3	0.126572	0.282843	0.292035	0.110309	0.354968		0.639932	0.581949	0.726199	0.0615183	0.634275	0.922774		0.072832
Taforalt	KJ127	35973	Human	I2	0.108894	0.10253	0.142836	0.118087	0.013435		0.632153	1.0246	0.729027	0.35426	1.1342	0.719835		0.0304056
Taforalt	KJ128	35975.T	Human	M3	0.179605	0.0784889	0.125865	0.0183848	0.766504		1.07127	1.27421	0.0212132	0.210011	0.47659	0.405879		0.252437
Taforalt	KJ129	35976	Human	M	0.0190919	0.521138	0.212132	0.158392	0.0346482		0.550129	0.500632	0.837214	0.384666	0.276479	0.033234		0.616597
Taforalt	KJ130	35982	Human	bone	0.0219203	0.126572	0.147785	0.548715	0.493561		0.318905	0.0608112	0.601041	0.200818	1.28764	1.01328		0.0381838
Taforalt	KJ131	35983	Human	bone	0.0650538	1.1837	0.75024	0.441942	0.569928		1.18158	1.67301	0.527502	0.463155	1.46583	0.499924		0.504874
Taforalt	KJ132	35984	Human		0.1492	0.171827	0.220617	0.188798	0.066468		0.31042	0.127986	0.379716	0.104652	0.954594	1.68291		0.00989949
Taforalt	KJ133	35985	Human	bone	1.41492	0.260922	0.131522	0.487904	0.131522		0.243245	0.773575	0.10748	0.0700036	0.272943	0.910754		0.0876812

## Sheet: Table SI 9
Table SI 9: Carbon isotope data on amino acids
Average of δ13CVPDB (‰)					Column Labels
Site	Row Labels	SEVA	Specie	tooth type	Ala	Asx	Glx	Gly	Hyp	Ile	Leu	Lys	Phe	Pro	Ser	Thr	Tyr	Val
Taforalt	KJ104	35820	Equid	M1 /2	-21.599	-17.083	-17.739	-14.666	-19.376		-30.8025	-19.55	-25.024	-18.148	-15.696	-11.991		-28.212
Taforalt	KJ105	35821	Barbary sheep	m3	-22.329	-18.835	-18.3595	-15.2695	-19.1925		-31.0275	-19.7295	-27.2245	-18.565	-12.1315	-12.342		-28.185
Taforalt	KJ106	35822	Equid	I	-22.982	-17.509	-18.5715	-14.038	-20.3125		-32.5895	-19.8965	-27.6745	-18.613	-14.7335	-13.598		-29.177
Taforalt	KJ107	35823	Hare	bone	-23.708	-20.815	-20.656	-14.864	-21.1045		-32.7655	-20.3765	-27.088	-19.9265	-11.184	-13.4525		-29.8825
Taforalt	KJ108	35824	Hartebeest	M3	-22.273	-17.099	-18.17	-13.6785	-20.212		-29.882	-19.427	-26.432	-17.811	-10.0565	-12.602		-26.1005
Taforalt	KJ109	35825	Equid	M3	-20.8065	-16.224	-17.0695	-11.901	-18.2145		-31.1915	-19.6345	-25.9745	-17.7145	-13.2645	-10.6915		-27.8055
Taforalt	KJ110	35826	Equid	Dp	-20.822	-17.116	-16.922	-12.938	-18.1215		-32.3715	-20.154	-27.293	-16.8545	-13.5035	-12.998		-29.4845
Taforalt	KJ111	35827	Hartebeest	M2	-23.1205	-18.151	-19.127	-14.947	-19.551		-32.942	-19.8065	-28.4155	-18.1025	-12.003	-15.085		-30.192
Taforalt	KJ112	35828	Fox	M1	-21.011	-17.791	-18.8585	-10.612	-17.794		-33.1235	-19.3565	-26.9395	-17.0145	-10.5895	-9.2165		-28.2265
Taforalt	KJ113	35829	Gazelle	M3	-23.9045	-18.555	-20.0375	-13.9675	-19.4105		-33.232	-19.0655	-28.108	-19.0865	-8.6685	-13.3845		-30.972
Taforalt	KJ114	35830	Barbary sheep	I	-23.3315	-19.816	-20.185	-13.777	-19.185		-33.149	-20.234	-28.1885	-19.005	-11.882	-15.7685		-29.256
Taforalt	KJ115	35833	Gazelle	P	-23.1125	-19.7	-19.06	-14.076	-19.497		-32.087	-19.519	-27.3495	-18.98	-8.8395	-12.4725		-30.272
Taforalt	KJ116	35834	Canid	M	-21.407	-19.739	-19.696	-12.984	-19.559		-32.6665	-21.468	-27.6525	-18.647	-11.1835	-10.1485		-29.5825
Taforalt	KJ117	35835	Gazelle	P2	-23.0975	-19.361	-20.0935	-15.0545	-19.2995		-33.5305	-19.4865	-28.496	-18.8155	-11.7305	-13.6235		-30.0495
Taforalt	KJ118	35836	Rhinoceros	M	-21.22	-16.94	-17.796	-12.4945	-18.8955		-34.873	-19.729	-26.631	-18.115	-12.7305	-10.573		-31.1625
Taforalt	KJ120	35959	Human	P4	-22.0255	-19.554	-19.495	-12.9235	-18.8885		-33.204	-20.256	-28.109	-17.9665	-12.797	-12.7515		-29.021
Taforalt	KJ121	35960	Human	I2	-23.1545	-19.11	-18.9405	-14.595	-18.7075		-32.926	-22.0325	-28.1995	-17.7675	-13.447	-12.715		-29.698
Taforalt	KJ122	35964	Human	m2	-23.039	-18.144	-17.5985	-16	-17.244		-31.025	-22.4025	-28.429	-16.911	-13.1815	-9.9225		-27.335
Taforalt	KJ123	35966	Human	bone	-21.002	-18.7125	-18.496	-16.185	-18.584		-32.341	-21.208	-28.3345	-17.5175	-11.788	-10.085		-27.8565
Taforalt	KJ124	35968	Human	M3	-22.093	-19.326	-19.4115	-14.606	-18.493		-33.6205	-22.051	-28.645	-18.322	-13.3215	-13.445		-30.0895
Taforalt	KJ125	35969	Human	I2	-21.786	-18.723	-18.3755	-14.166	-18.9095		-32.2255	-22.5415	-28.0525	-17.9605	-11.5005	-11.0755		-29.36
Taforalt	KJ126	35972	Human	P3	-22.198	-19.6005	-18.748	-14.0185	-18.498		-33.34	-21.4285	-28.445	-18.2105	-12.2755	-11.345		-29.8555
Taforalt	KJ127	35973	Human	I2	-22.148	-20.166	-19.1815	-14.564	-18.6685		-32.157	-21.493	-28.8725	-18.141	-12.722	-12.5		-28.7865
Taforalt	KJ128	35975.T	Human	M3	-22.366	-19.854	-19.549	-14.059	-18.7315		-33.323	-20.929	-28.3405	-18.4015	-13.7405	-13.6885		-29.779
Taforalt	KJ129	35976	Human	M	-21.079	-20.005	-18.3085	-14.15	-18.286		-32.5985	-21.064	-27.647	-18.06	-10.9005	-10.6405		-30.047
Taforalt	KJ130	35982	Human	bone	-21.902	-20.593	-18.5175	-15.684	-18.926		-31.668	-22.1455	-28.275	-17.552	-11.303	-9.9905		-29.08
Taforalt	KJ131	35983	Human	bone	-21.771	-20.026	-18.611	-15.2765	-17.9635		-30.8975	-21.193	-28.182	-17.467	-12.1665	-9.8095		-26.7885
Taforalt	KJ132	35984	Human		-20.541	-21.105	-20.348	-15.5675	-19.2605		-33.3325	-21.5815	-28.7485	-18.5245	-11.1255	-12.35		-29.391
Taforalt	KJ133	35985	Human	bone	-20.039	-19.6845	-19.6095	-14.0535	-18.9565		-32.116	-21.51	-27.7095	-17.524	-11.618	-12.2485		-28.8415
	KJ119	liver 1577a	standard		-20.98	-16.7	-14.99	-10.73		-23.77	-28.9	-16.52	-24.98	-18.76	-8.32	-9.78	-30.05	-24.69
	KJ134	liver 1577b	standard		-19.37	-15.41	-14.27	-9.35		-23.01	-28.88	-16.76	-25.31	-17.93	-7.23	-9.7	-31.74	-24.44
StdDev of δ13CVPDB (‰)					Column Labels
Site	Row Labels	SEVA	Specie	tooth type	Ala	Asx	Glx	Gly	Hyp	Ile	Leu	Lys	Phe	Pro	Ser	Thr	Tyr	Val
Taforalt	KJ104	35820	Equid	M1 /2	0.0820244	0.141421	0.108894	0.453963	0.140007		0.0572756	0.374767	0.19799	0.0975807	0.162635	0.254558		0.0296985
Taforalt	KJ105	35821	Barbary sheep	m3	0.127279	0.34224	0.222739	0.280721	0.324562		0.108187	0.289207	0.0346482	0.274357	0.251023	0.295571		0.0989949
Taforalt	KJ106	35822	Equid	I	0.00707107	0.313955	0.0756604	0.274357	0.118087		0.1393	0.0403051	1.25794	0.103238	0.328805	0.247487		0.79196
Taforalt	KJ107	35823	Hare	bone	0.207889	0.325269	0.179605	0.528916	0.168999		0.188798	0.205768	0.145664	0.164756	0.537401	0.111016		0.0388909
Taforalt	KJ108	35824	Hartebeest	M3	0.220617	0.523259	0.118794	0.820951	0.482247		0.0650538	0.0353553	0.203647	0.019799	0.745998	0.370524		0.359917
Taforalt	KJ109	35825	Equid	M3	0.11243	0.403051	0.0742462	0.0325269	0.276479		0.263751	0.0982878	0.00212132	0.153442	0.450427	0.30052		0.57912
Taforalt	KJ110	35826	Equid	Dp	0.0127279	0.00424264	0.159806	0.118794	0.234052		0.210011	0.499217	0.254558	0.105359	0.109602	0.0480833		0.331633
Taforalt	KJ111	35827	Hartebeest	M2	0.0360624	0.0509117	0.0282843	0.236174	0.11738		0.17112	0.00777817	0.239709	0.0374767	0.247487	0.0494975		0.0367696
Taforalt	KJ112	35828	Fox	M1	0.0183848	0.0707107	0.249609	0.0254558	0.0579828		0.135057	0.647003	0.267993	0.11243	0.334462	0.207182		0.137886
Taforalt	KJ113	35829	Gazelle	M3	0.00212132	0.35921	0.0459619	0.157685	0.19304		0.0254558	0.1492	0.079196	0.191626	0.243952	0.331633		0.0523259
Taforalt	KJ114	35830	Barbary sheep	I	0.197283	0.151321	0.127279	0.059397	0.190919		0.837214	0.612354	0.130815	0.0367696	0.613769	0.395273		1.01541
Taforalt	KJ115	35833	Gazelle	P	0.00777817	0.100409	0.178191	0.562857	0.328098		0.121622	0.155563	0.10253	0.00707107	0.386787	0.279307		0.280014
Taforalt	KJ116	35834	Canid	M	0.0890955	0.998435	0	0.178191	0.0424264		0.269408	0.046669	0.033234	0.0452548	0.142128	0.160513		0.234052
Taforalt	KJ117	35835	Gazelle	P2	0.198697	0.195161	0.17607	0.147785	0.1492		0.345775	0.0558614	0.110309	0.0770746	0.62579	0.826608		0.053033
Taforalt	KJ118	35836	Rhinoceros	M	0.046669	0.0494975	0.186676	0.330219	0.0106066		0.127279	0.0113137	0.274357	0.0339411	0.053033	0.308299		0.0954594
Taforalt	KJ120	35959	Human	P4	0.0714178	0.125865	0.0806102	0.0148492	0.0304056		0.271529	0.140007	0.371938	0.0601041	0.203647	0.574878		0.209304
Taforalt	KJ121	35960	Human	I2	0.113844	0.0240416	0.00353553	0.234759	0.161927		0.16122	0.178898	0.116673	0.0318198	0.453963	0.397394		0.0113137
Taforalt	KJ122	35964	Human	m2	0.0834386	0.316784	0.180312	0.019799	0.18809		0.173948	0.135057	0.441235	0.141421	0.236881	0.201525		0.852771
Taforalt	KJ123	35966	Human	bone	0.00565685	0.120915	0.0806102	0.0410122	0.154149		0.371938	0.0579828	0.0827315	0.0671751	0.142836	0.00848528		0.122329
Taforalt	KJ124	35968	Human	M3	0.0494975	0.0763675	0.0304056	0.0353553	0.267286		0.0685894	0.371938	0.233345	0.175362	0.222739	0.0212132		0.0190919
Taforalt	KJ125	35969	Human	I2	0.0961665	0.176777	0.301935	0.00707107	0.467398		0.0417193	1.10238	0.429214	0.120915	0.195869	0.0289914		0.363453
Taforalt	KJ126	35972	Human	P3	0.00282843	0.0205061	0.151321	0.0176777	0.292742		0.100409	0.521138	0.0183848	0.0601041	0.369817	0.239002		0.013435
Taforalt	KJ127	35973	Human	I2	0.0141421	0.0565685	0.207182	0.13435	0.184555		0.292742	0.285671	0.111016	0.0452548	0.671751	0.813173		0.661145
Taforalt	KJ128	35975.T	Human	M3	0	0.517602	0.128693	0.0494975	0.0799031		0.0424264	0.253144	0.0403051	0.00636396	0.490025	0.557907		0.175362
Taforalt	KJ129	35976	Human	M	0.0381838	0.108894	0.0954594	0.147078	0.623668		0.00636396	0.280014	0.363453	0.0254558	0.115258	0.351432		0.00707107
Taforalt	KJ130	35982	Human	bone	0.16122	0.18809	0.190212	0.0707107	0.14425		0.0169706	0.248194	0.162635	0.173948	0.220617	0.208597		0.0919239
Taforalt	KJ131	35983	Human	bone	0.00141421	0.240416	0.059397	0.0671751	0.119501		0.506996	0.0141421	0.0311127	0.113137	0.682358	0.529623		1.05995
Taforalt	KJ132	35984	Human		0.0919239	0.366281	0.475176	0.157685	0.528209		0.0586899	0.345775	0.4179	0.0205061	0.320319	0.108894		0.0339411
Taforalt	KJ133	35985	Human	bone	0.086267	0.183141	0.0714178	0.053033	0.292035		0.0325269	0.166877	0.0219203	0.202233	0.210718	0.460327		0.105359

## Sheet: Table SI 10
Features	Component 1	Component 2
D13CGly-Phe	0.141539	-0.542892
D13CVal-Phe	0.128802	-0.526615
Bulk d15N	0.186017	-0.44155
d13CGly	0.313702	-0.189129
d13CVal	0.318898	-0.085403
Bulk d13C	0.343945	0.0350762
d13CPro	0.330102	0.0893274
d13CLys	0.323062	0.105106
d13CAla	0.321831	0.129418
d13CAsx	0.323735	0.131876
d13CGlx	0.314763	0.185233
d13CPhe	0.299299	0.318129
Table SI 10: Covariance matrix with the calculated eigenvalues for each of the features used.
